# Supplementary material for: Fe(iii) and Cr(vi) ions' removal using AgNPs/GO/chitosan nanocomposite as an adsorbent for wastewater treatment
Source: Royal Society of Chemistry journal article supplement (doi:10.1039/d2ra01612e), 2022-01-01
Supplement: d2ra01612e1.pdf [file d2ra01612e1.pdf]

## Supplementary Materials

### Tables

**Table 1.** Company and molecular weight for materials used

| No | Materials                   | Company                                                 |
|----|-----------------------------|---------------------------------------------------------|
| 1  | industrial wastewater       | Rocket fertilizer factory in new salhia, sharqia, Egypt |
| 2  | Chitosan                    | Local market, Ismailia, Egypt                           |
| 3  | hydrochloric acid           | Alpha chemika, Egypt                                    |
| 4  | sodium hydroxide            | Alpha chemika, Egypt                                    |
| 5  | Graphite powder             | Alpha chemika, Egypt                                    |
| 6  | Silver nitrate              | Alpha chemika, Egypt                                    |
| 7  | Sodium borohydride          | Oxford lab fine chem LLP, Egypt                         |
| 8  | Trisodium Citrate Dihydrate | Oxford lab fine chem LLP, Egypt                         |
| 9  | potassium dichromate        | Oxford lab fine chem LLP, Egypt                         |
| 10 | ferric chloride             | Oxford lab fine chem LLP, Egypt                         |
| 11 | Manganese chloride          | Oxford lab fine chem LLP, Egypt                         |

**Table 2.** The characteristics of the industrials wastewater

| Colour     | PH   | TSS<br>(ppm) | COD<br>(ppm) | TDS<br>(ppm) | Fe<br>(ppm) | Mn<br>(ppm) | Alk |
|------------|------|--------------|--------------|--------------|-------------|-------------|-----|
| Light grey | 3.22 | 542          | 5500         | 9160         | 68.15       | 49.29       | 0   |

**Table 3.** Langmuir isotherm models

| Heavy metals | Langmuir model                                               | Plotting            | $q_0(\text{mg}\cdot\text{g}^{-1})$ | $(K_L(\text{L}\cdot\text{mg}^{-1}))$ | $R_L$ | $R^2$ |
|--------------|--------------------------------------------------------------|---------------------|------------------------------------|--------------------------------------|-------|-------|
| Cr (VI)      | Nonlinear:<br>$q_e = q_0 \frac{K_L C_e}{1 + K_L C_e}$<br>(1) | $q_e$ vs. $C_e$     | 60443.73                           | 0.0007                               | 0.972 | 0.996 |
|              | Linear :<br>$= 1/q_0 K_L + C_e/q_0$<br>(2)                   | $C_e/q_e$ vs. $C_e$ | -159.39                            | -0.052                               | 0.791 | 0.791 |
|              | Nonlinear:                                                   |                     |                                    |                                      |       |       |

|  |                                             |                     |         |       |       |       |
|--|---------------------------------------------|---------------------|---------|-------|-------|-------|
|  | $q_e = q_o \frac{K_L C_e}{1 + K_L C_e}$ (1) |                     |         |       |       |       |
|  | Linear :<br>$= 1/q_o K_L + C_e/q_o$ (2)     | $C_e/q_e$ vs. $C_e$ | 254.771 | 0.004 | 0.977 | 0.430 |

**Table 4.** Freundlich isotherm models

| Heavy metals | Freundlich model                                | Plotting               | $(K_f((\text{mg/g})/(\text{mg/L})^n))$ | n        | R <sup>2</sup> |
|--------------|-------------------------------------------------|------------------------|----------------------------------------|----------|----------------|
| Cr (VI)      | Nonlinear:<br>$q_e = K_f C_e^{1/n}$ (3)         | $q_e$ vs $C_e$         | 20.053                                 | 0.787    | 0.957          |
|              | Linear :<br>$\ln K_F + \frac{1}{n} \ln C_e$ (4) | $\ln q_e$ vs $\ln C_e$ | 5.803127                               | 0.557848 | 0.921          |
| Fe (III)     | Nonlinear:<br>$q_e = K_f C_e^{1/n}$ (3)         | $q_e$ vs. $C_e$        | 0.826977                               | 1.040647 | 0.997          |
|              | Linear :<br>$\ln K_F + \frac{1}{n} \ln C_e$ (4) | $\ln q_e$ vs $\ln C_e$ | 2.803122                               | 1.461737 | 0.988          |

**Table 5.** Dubinin-Radushkevich isotherm models

| Heavy metals | Dubinin-Radushkevich | Plotting | $q_m$ | $\beta$ | (E(kJ·mol <sup>-1</sup> | R <sup>2</sup> |
|--------------|----------------------|----------|-------|---------|-------------------------|----------------|
|--------------|----------------------|----------|-------|---------|-------------------------|----------------|

|          | model                                                         |                               |          |       |          |       |
|----------|---------------------------------------------------------------|-------------------------------|----------|-------|----------|-------|
| Cr (VI)  | Non-linear:<br>$q_e = q_m \exp^{-\beta \varepsilon^2}$<br>(5) | $q_e$ vs. $\varepsilon^2$     | 301.042  | 2.09  | -488.589 | 0.972 |
|          | Linear :<br>$q_e = \ln q_m - \beta \varepsilon^2$<br>(6)      | $\ln q_e$ vs. $\varepsilon^2$ | 1023.484 | 1.288 | -196.963 | 0.924 |
| Fe (III) | Non-linear:<br>$q_e = q_m \exp^{-\beta \varepsilon^2}$<br>(5) | $q_e$ vs. $\varepsilon^2$     | 234.158  | 0.002 | -14.458  | 0.934 |
|          | Linear :<br>$q_e = \ln q_m - \beta \varepsilon^2$<br>(6)      | $\ln q_e$ vs $\varepsilon^2$  | 45.388   | 0.001 | -159.231 | 0.754 |

**Table 6.**Tempkin models

| Heavy metals | Tempkin model                                                          | Plotting           | b       | $K_T$ | B       | $R^2$ |
|--------------|------------------------------------------------------------------------|--------------------|---------|-------|---------|-------|
| Cr (VI)      | Nonlinear:<br>$q_e = \frac{RT}{b} \ln (K_T C_e)$<br>(7)                | $q_e$ vs. $C_e$    | 7.849   | 0.502 | 315.647 | 0.725 |
|              | Linear :<br>$q_e = \frac{RT}{b} \ln K_T + \frac{RT}{b} \ln C_e$<br>(8) | $q_e$ vs $\ln C_e$ | 7.849   | 0.502 | 315.647 | 0.858 |
| Fe (III)     | Nonlinear:<br>$q_e = \frac{RT}{b} \ln (K_T C_e)$<br>(7)                | $q_e$ vs. $C_e$    | 106.797 | 0.293 | 23.599  | 0.650 |
|              | Linear :<br>$q_e = \frac{RT}{b} \ln K_T + \frac{RT}{b} \ln C_e$<br>(8) | $q_e$ vs $\ln C_e$ | 106.797 | 0.293 | 23.599  | 0.650 |

**Table 7.**The pseudo-first-order models

| Heavy metal | The pseudo-first-order model | Plotting | $k_1$<br>min <sup>-1</sup> | $q_e$<br>mg | $R^2$ |
|-------------|------------------------------|----------|----------------------------|-------------|-------|
|-------------|------------------------------|----------|----------------------------|-------------|-------|

| metals   |                                                                |                     | 1     | g <sup>-1</sup> |       |
|----------|----------------------------------------------------------------|---------------------|-------|-----------------|-------|
| Cr (VI)  | Nonlinear :<br>(1) $q_t = q_e (1 - e^{-k_1 t})$                | $q_t$ vs. $t$       | 0.189 | 41.698          | 0.325 |
|          | Linear :<br>(2) $\log(q_e - q_t) = \log(q_e) - k_1 t / \ln 10$ | $(e^{-q_t})$ vs $t$ | 0.040 | 15.062          | 0.786 |
| Fe (III) | Nonlinear :<br>(1) $q_t = q_e (1 - e^{-k_1 t})$                | $q_t$ vs $t$        | 0.029 | 38.401          | 0.764 |
|          | Linear :<br>(2) $\log(q_e - q_t) = \log(q_e) - k_1 t / \ln 10$ | $(e^{-q_t})$ vs $t$ | 0.001 | 40.139          | 0.442 |

**Table 8.** The pseudo-second-order model

| Heavy metals | The pseudo-second-order model                              | Plotting       | $K_2$<br>g mg <sup>-1</sup> min <sup>-1</sup> | $q_e$<br>mg g <sup>-1</sup> | R <sup>2</sup> |
|--------------|------------------------------------------------------------|----------------|-----------------------------------------------|-----------------------------|----------------|
| Cr (VI)      | Nonlinear:<br>$q_t = k_2 q_e^2 t / (1 + k_2 q_e t)$<br>(3) | $q_t$ vs $t$   | 0.002                                         | 45.469                      | 0.686          |
|              | Linear :<br>$t/q_t = 1/(k_2 q_e^2) + t/q_e$<br>(4)         | $t/q_t$ vs $t$ | -0.001                                        | 51.120                      | 0.996          |
| Fe (III)     | Nonlinear:<br>$q_t = k_2 q_e^2 t / (1 + k_2 q_e t)$<br>(3) | $q_t$ vs $t$   | 0.0008                                        | 44.933                      | 0.681          |
|              | Linear :<br>$t/q_t = 1/(k_2 q_e^2) + t/q_e$<br>(4)         | $t/q_t$ vs $t$ | 0.023                                         | 37.993                      | 0.999          |

**Table 9.** Intraparticle diffusion models

| Heavy metals | Intraparticle diffusion model | Plotting    | $k_1$<br>mg g <sup>-1</sup> min <sup>-0.5</sup> | C<br>mg g <sup>-1</sup> | R <sup>2</sup> |
|--------------|-------------------------------|-------------|-------------------------------------------------|-------------------------|----------------|
| Cr (VI)      | Non-linear:                   | $q$ vs. $t$ | 1.187                                           | 31.923                  | 0.891          |

|          |                                             |                  |       |        |       |
|----------|---------------------------------------------|------------------|-------|--------|-------|
|          | $q = k_i t^{0.5} + C$<br>(5)                |                  |       |        |       |
|          | $q = k_i t^{0.5} + C$ Linear:<br>(5)        | $q$ vs $t^{0.5}$ | 1.187 | 31.923 | 0.891 |
| Fe (III) | Non-linear:<br>$q = k_i t^{0.5} + C$<br>(5) | $q$ vs. $t$      | 0.872 | 31.339 | 0.561 |
|          | $q = k_i t^{0.5} + C$ Linear:<br>(5)        | $q$ vs $t^{0.5}$ | 0.872 | 31.339 | 0.561 |

**Table 10.** Pore diffusion models

| Heavy metals | Pore diffusion model                                                                    | Plotting                       | $k_p$<br>min <sup>-0.5</sup> | $D_{ii}$<br>cm <sup>2</sup> min <sup>-1</sup> | R2    |
|--------------|-----------------------------------------------------------------------------------------|--------------------------------|------------------------------|-----------------------------------------------|-------|
| Cr (VI)      | $\frac{6}{r_o} \left( -\frac{D_{ii} \cdot t}{\pi} \right)^{1/2} = k_p * t^{1/2}$<br>(6) | $\frac{q_t}{q_e}$ vs $t^{0.5}$ | 0.112                        | 6.243                                         | 0.891 |
| Fe (III)     | $\frac{6}{r_o} \left( -\frac{D_{ii} \cdot t}{\pi} \right)^{1/2} = k_p * t^{1/2}$<br>(6) | $\frac{q_t}{q_e}$ vs $t^{0.5}$ | 0.170                        | 0.00001                                       | 0.561 |

**Table 11.** Film diffusion models

| Heavy metals | film diffusion model                                                             | Plotting                                         | $k_{fd}$<br>min <sup>-1</sup> | $D_{ii}$<br>cm <sup>2</sup> min <sup>-1</sup> | R2    |
|--------------|----------------------------------------------------------------------------------|--------------------------------------------------|-------------------------------|-----------------------------------------------|-------|
| Cr (VI)      | $-\left( \frac{D_i}{r_o^2} \right) \cdot \pi^2 \cdot t = -k_{fd} \cdot t$<br>(7) | $\ln \left( 1 - \frac{q_t}{q_e} \right)$ vs. $t$ | 0.055                         | 2.81.07                                       | 0.817 |
| Fe (III)     | $-\left( \frac{D_i}{r_o^2} \right) \cdot \pi^2 \cdot t = -k_{fd} \cdot t$<br>(7) | $\ln \left( 1 - \frac{q_t}{q_e} \right)$ vs $t$  | 0.160                         | 0.0001                                        | 0.860 |

## List of abbreviation

| Abbreviation | Terminology                       |
|--------------|-----------------------------------|
| FTIR         | Fourier transform infra-red       |
| SEM          | Scanning electron microscopic     |
| TEM          | Transpiration electro microscopic |
| BET          | Brunauer, Emmett, Teller          |
| TGA          | Thermogravimetric analysis        |
| COD          | Chemical Oxygen Demand            |
| TDS          | Total Dissolved Solids            |
| XRD          | X-ray diffraction                 |
| TSS          | Total suspended solids            |
| AIK          | Alkalinity                        |

## List of materials

| Materials                                            | Index                                                                           |
|------------------------------------------------------|---------------------------------------------------------------------------------|
| industrial wastewater                                | WW                                                                              |
| Chitosan                                             | Cs                                                                              |
| Chitin                                               | Ct                                                                              |
| hydrochloric acid                                    | HCl                                                                             |
| sodium hydroxide                                     | NaOH                                                                            |
| Graphite oxide                                       | GO                                                                              |
| Graphite powder                                      | G                                                                               |
| Silver nitrate                                       | AgNO <sub>3</sub>                                                               |
| Sodium borohydride                                   | NaBH <sub>4</sub>                                                               |
| Trisodium Citrate Dihydrate                          | C <sub>6</sub> H <sub>5</sub> Na <sub>3</sub> O <sub>7</sub> ·2H <sub>2</sub> O |
| potassium dichromate                                 | K <sub>2</sub> Cr <sub>2</sub> O <sub>7</sub>                                   |
| ferric chloride FeCl <sub>3</sub> ·6H <sub>2</sub> O | FeCl <sub>3</sub> ·6H <sub>2</sub> O                                            |
| silver nanoparticles                                 | AgNPs                                                                           |
| calcium carbonate                                    | CaCO <sub>3</sub>                                                               |
| calcium chloride                                     | CaCL <sub>2</sub>                                                               |
| carbon dioxide                                       | CO                                                                              |
| Distilled water                                      | Dw                                                                              |
